# Supplementary material
Source: publisher figshare collection journal article supplement (https://sage.figshare.com/ndownloader/files/25690894)
Supplement: Supplementary file [file 25690894]

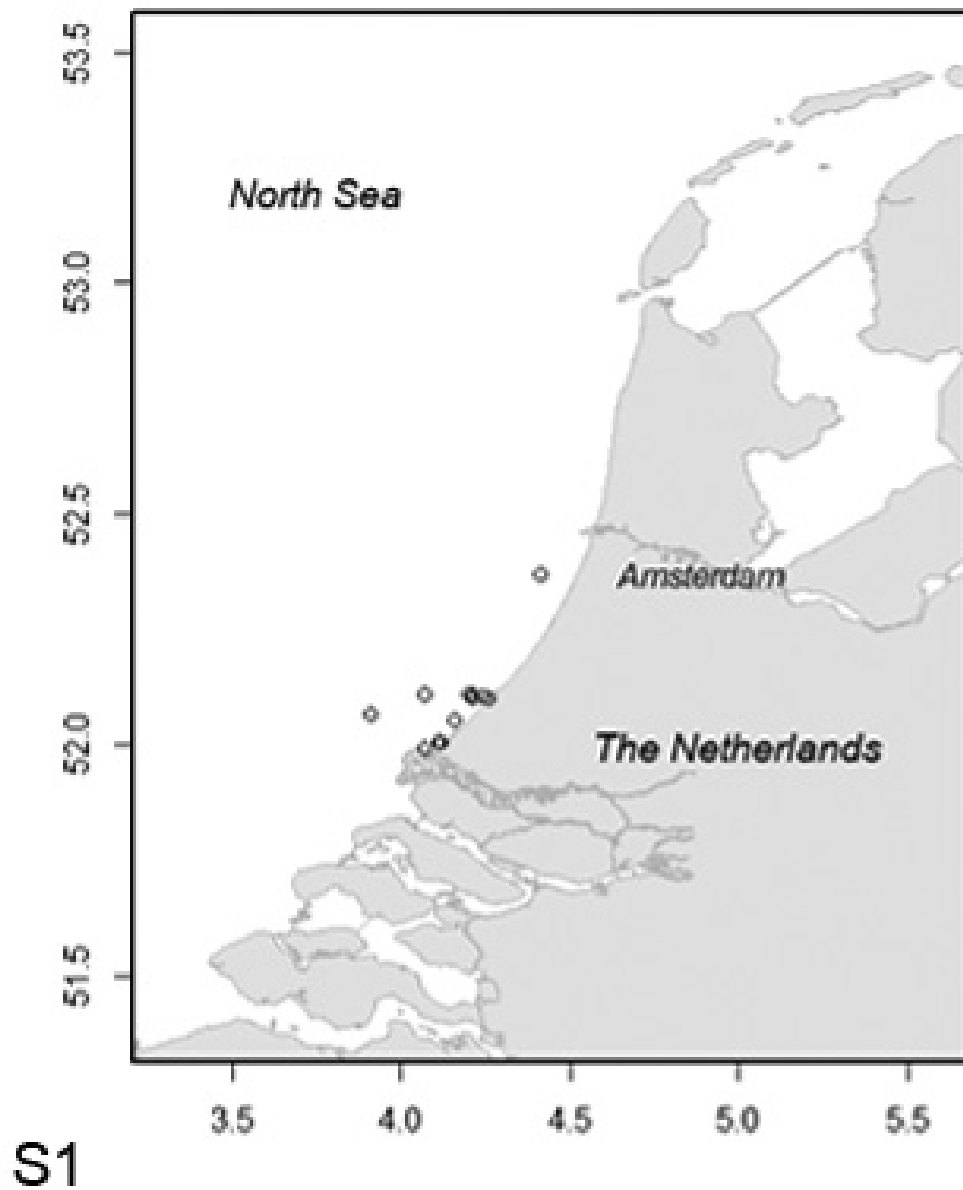

Supplemental Figure S1. Locations of gillnets in which harbor porpoises included in this study (n=12) were bycaught.

*Veterinary Pathology: Supplemental Materials.*  
IJseldijk et al. Challenges in the assessment of bycatch:  
Post-mortem findings in harbor porpoises (*Phocoena phocoena*) retrieved from gillnets.

**Supplemental Table S1:** Criteria gained from literature review with associated references

| Criteria                                                                      | Criteria reported by                                                                                                                                                                                    |
|-------------------------------------------------------------------------------|---------------------------------------------------------------------------------------------------------------------------------------------------------------------------------------------------------|
| <b>1: Findings likely related to the drowning process</b>                     |                                                                                                                                                                                                         |
| Hyphema                                                                       | Siebert et al. 2006; Bernaldo de Quirós et al. 2013                                                                                                                                                     |
| Pulmonary edema                                                               | Birkun 1994; García-Hartmann et al. 1994; Kuiken 1994; Lipscomb et al. 1994; Siebert et al. 1994; Knieriem & García-Hartmann 2001; García-Hartmann et al. 2004; Siebert et al. 2006; Jepson et al. 2013 |
| Pulmonary emphysema                                                           | Birkun 1994; García-Hartmann et al. 1994; Kuiken 1994; Lipscomb et al. 1994; Siebert et al. 1994; García-Hartmann et al. 2004; Siebert et al. 2006; Jepson et al. 2013                                  |
| Pleural petechiae or pulmonary hemorrhage                                     | Birkun 1994; Kuiken 1994; Lipscomb et al. 1994; Knieriem & García-Hartmann 2001; García-Hartmann et al. 2004; Siebert et al. 2006                                                                       |
| Changes in reticulum fiber structures of lung                                 | Knieriem & García-Hartmann 2001                                                                                                                                                                         |
| Regurgitation of food                                                         | Birkun 1994                                                                                                                                                                                             |
| Epicardial petechiae                                                          | Birkun 1994; Kuiken 1994; García-Hartmann et al. 2004                                                                                                                                                   |
| Organ congestion                                                              | Birkun 1994; Lipscomb et al. 1994; Bernaldo de Quirós et al. 2013; Jepson et al. 2013                                                                                                                   |
| Disseminated congestion                                                       | Birkun 1994; Bernaldo de Quirós et al. 2013                                                                                                                                                             |
| Presence of foreign material in lungs or bones                                | Birkun 1994; Larsen & Holm 1994                                                                                                                                                                         |
| <b>2: Findings related to the direct contact with the gillnet</b>             |                                                                                                                                                                                                         |
| Superficial incisions in edges of the mouth, fins or tail(stock)/fluke        | Birkun 1994; García-Hartmann et al. 1994; Kuiken 1994; Tregenza 1994; Siebert et al. 2001; García-Hartmann et al. 2004; Bernaldo de Quirós et al. 2013; Jepson et al. 2013                              |
| Encircling lesions, anywhere on the body                                      | Tregenza 1994;                                                                                                                                                                                          |
| Subcutaneous hemorrhage/ contusions                                           | García-Hartmann et al. 1994; Kuiken 1994; García-Hartmann et al. 2004; Jepson et al. 2013                                                                                                               |
| Intramuscular hemorrhage, myofiber degeneration or skeletal muscle contusions | García-Hartmann et al. 2004; Siebert et al. 2006; Jepson et al. 2013                                                                                                                                    |
| Disseminated gas bubbles                                                      | Moore et al. 2009; Bernaldo de Quirós et al. 2013                                                                                                                                                       |
| Pneumothorax                                                                  | García-Hartmann et al. 1994                                                                                                                                                                             |
| (Acute) skull or rib fractures                                                | García-Hartmann et al. 1994; Kuiken 1994; Jepson et al. 2013                                                                                                                                            |
| <b>3: Findings related to disentanglement of bycaught animals</b>             |                                                                                                                                                                                                         |
| Amputations                                                                   | Birkun 1994; García-Hartmann et al. 1994; Kuiken 1994; García-Hartmann et al. 2004; Jepson et al. 2013                                                                                                  |
| Presence of fishing material (netting, rope) around body extremities          | Tregenza 1994; Kuiken 1994; García-Hartmann et al. 2004; Jepson et al. 2013                                                                                                                             |
| Gaff marks                                                                    | Tregenza 1994; Kuiken 1994; García-Hartmann et al. 2004                                                                                                                                                 |
| Penetrating incision wounds or lacerations (tissue tears) into body cavities  | Birkun 1994; Kuiken 1994; Tregenza 1994; García-Hartmann et al. 2004; Jepson et al. 2013                                                                                                                |
| <b>4: General health status of bycaught animals</b>                           |                                                                                                                                                                                                         |
| Good nutritional condition                                                    | Kuiken 1994; García-Hartmann et al. 2004; Siebert et al. 2006; Jepson et al. 2013                                                                                                                       |
| Low incidence of parasitism                                                   | García-Hartmann et al. 1994; Siebert et al. 2006                                                                                                                                                        |
| Exclusion of other cause of death                                             | García-Hartmann et al. 1994; Kuiken 1994; García-Hartmann et al. 2004                                                                                                                                   |
| Recently ingested gastric content                                             | García-Hartmann et al. 1994; Kuiken 1994; Lipscomb et al. 1994; García-Hartmann et al. 2004; Bernaldo de Quirós et al. 2013; Jepson et al. 2013                                                         |

*Veterinary Pathology: Supplemental Materials.*

IJsseldijk et al. Challenges in the assessment of bycatch:

Post-mortem findings in harbor porpoises (*Phocoena phocoena*) retrieved from gillnets.

**Supplemental Table S2:** Basic information of bycaught harbor porpoises

| Case # | Date       | DCC at retrieval | Frozen | Total length (cm) | Weight (kg) | Age class | Age (years) | Sex    | DCC at necropsy | NCC |
|--------|------------|------------------|--------|-------------------|-------------|-----------|-------------|--------|-----------------|-----|
| 1      | 2008-02-13 | 1                | Y      | 117               | 24.3        | Juvenile  | <1          | Female | 2               | 3   |
| 2      | 2011-01-31 | 1                | N      | 115               | 31          | Juvenile  | <1          | Male   | 1               | 1   |
| 3      | 2011-03-28 | 1                | N      | 117               | 24.5        | Juvenile  | <1          | Female | 1               | 2   |
| 4      | 2013-09-04 | 1                | N      | 141               | 38.5        | Adult     | 10          | Female | 4               | 1   |
| 5      | 2013-12-10 | 1                | N      | 101.5             | 16.2        | Juvenile  | <1          | Male   | 1               | 6   |
| 6      | 2014-06-03 | 1                | N      | 101.5             | 19          | Juvenile  | (<)1        | Male   | 1               | 3   |
| 7      | 2014-10-06 | 1                | N      | 93.5              | 13.7        | Juvenile  | <1          | Male   | 1               | 4   |
| 8      | 2015-06-27 | 2                | N      | 115               | 24.5        | Juvenile  | 1           | Male   | 2               | 2   |
| 9      | 2015-06-12 | 4                | N      | 171               | 48          | Adult     | 8           | Female | 4               | 6   |
| 10     | 2015-08-20 | 1                | N      | 115               | 25.5        | Juvenile  | 1           | Female | 1               | 3   |
| 11     | 2017-03-11 | 1                | N      | 115               | 28          | Juvenile  | <1          | Male   | 1               | 1   |
| 12     | 2019-05-27 | 2                | N      | 115.5             | 24          | Juvenile  | 1           | Male   | 2               | 4   |

# Veterinary Pathology: Supplemental Materials.

IJsseldijk et al. Challenges in the assessment of bycatch:

Post-mortem findings in harbor porpoises (*Phocoena phocoena*) retrieved from gillnets.

Supplemental Table S3: Overview of scored criteria and main pathological findings

| Criteria                                        | Based on                              | Case #1                                                                     | Case #2                                                                         | Case #3                                                            | Case #4                                                                                                                                                | Case #5                                                                                                                                                                                                  | Case #6                                                                                                                                                                                         | Case #7                                                            | Case #8                                                          | Case #9                                              | Case #10                                                                                                               | Case #11                                    | Case #12                                                                                                                                |
|-------------------------------------------------|---------------------------------------|-----------------------------------------------------------------------------|---------------------------------------------------------------------------------|--------------------------------------------------------------------|--------------------------------------------------------------------------------------------------------------------------------------------------------|----------------------------------------------------------------------------------------------------------------------------------------------------------------------------------------------------------|-------------------------------------------------------------------------------------------------------------------------------------------------------------------------------------------------|--------------------------------------------------------------------|------------------------------------------------------------------|------------------------------------------------------|------------------------------------------------------------------------------------------------------------------------|---------------------------------------------|-----------------------------------------------------------------------------------------------------------------------------------------|
| Hyphema                                         | Gross assessment                      | Unilateral (L)                                                              | Bilateral                                                                       | Absent                                                             | Bilateral                                                                                                                                              | Unilateral (R)                                                                                                                                                                                           | Absent                                                                                                                                                                                          | Absent                                                             | Absent                                                           | Unknown                                              | Unilateral (R)                                                                                                         | Absent                                      | Absent                                                                                                                                  |
| Amputations                                     | Gross assessment                      | No                                                                          | No                                                                              | No                                                                 | No                                                                                                                                                     | No                                                                                                                                                                                                       | No                                                                                                                                                                                              | No                                                                 | No                                                               | No                                                   | No                                                                                                                     | No                                          | No                                                                                                                                      |
| Presence of gear                                | Gross assessment                      | No                                                                          | No                                                                              | No                                                                 | No                                                                                                                                                     | No                                                                                                                                                                                                       | No                                                                                                                                                                                              | No                                                                 | No                                                               | No                                                   | No                                                                                                                     | No                                          | No                                                                                                                                      |
| Penetrating incision/wound                      | Gross assessment                      | No                                                                          | No                                                                              | No                                                                 | No                                                                                                                                                     | No                                                                                                                                                                                                       | No                                                                                                                                                                                              | No                                                                 | No                                                               | No                                                   | No                                                                                                                     | No                                          | No                                                                                                                                      |
| Gaff marks                                      | Gross assessment                      | No                                                                          | No                                                                              | No                                                                 | No                                                                                                                                                     | No                                                                                                                                                                                                       | No                                                                                                                                                                                              | No                                                                 | No                                                               | No                                                   | No                                                                                                                     | No                                          | No                                                                                                                                      |
| Subcutaneous hemorrhage                         | Gross assessment                      | Present, submandibular, head and on M. longissimus dorsi                    | Present, on skull (caudodorsally)                                               | Present, mandible                                                  | No                                                                                                                                                     | No                                                                                                                                                                                                       | No                                                                                                                                                                                              | No                                                                 | Present, scapula                                                 | Likely not, but autolysis hampers diagnosis          | No                                                                                                                     | No                                          | No                                                                                                                                      |
| Intramuscular hemorrhage                        | Gross assessment                      | No                                                                          | No                                                                              | No                                                                 | No                                                                                                                                                     | No                                                                                                                                                                                                       | No                                                                                                                                                                                              | No                                                                 | No                                                               | Likely not, but autolysis hampers diagnosis          | No                                                                                                                     | No                                          | No                                                                                                                                      |
| Acute skull fractures                           | Gross assessment                      | No                                                                          | No                                                                              | Yes, left mandible                                                 | No                                                                                                                                                     | No                                                                                                                                                                                                       | No                                                                                                                                                                                              | No                                                                 | No                                                               | No                                                   | No                                                                                                                     | No                                          | No                                                                                                                                      |
| Gas bubbles                                     | Gross assessment                      | Unknown                                                                     | No                                                                              | No                                                                 | Unknown                                                                                                                                                | No                                                                                                                                                                                                       | No                                                                                                                                                                                              | No                                                                 | No                                                               | Unknown                                              | No                                                                                                                     | No                                          | No                                                                                                                                      |
| Pneumothorax                                    | Gross assessment                      | No                                                                          | No                                                                              | No                                                                 | Unknown                                                                                                                                                | No                                                                                                                                                                                                       | No                                                                                                                                                                                              | No                                                                 | No                                                               | Unknown                                              | No                                                                                                                     | No                                          | No                                                                                                                                      |
| Recent ingested gastric content                 | Gross assessment                      | Present                                                                     | Present                                                                         | Present                                                            | Present                                                                                                                                                | Some                                                                                                                                                                                                     | Present                                                                                                                                                                                         | Present                                                            | Some                                                             | Absent                                               | Present                                                                                                                | Present                                     | Present                                                                                                                                 |
| Regurgitation of food in upper alimentary tract | Gross assessment                      | Absent                                                                      | Absent                                                                          | Present                                                            | Present                                                                                                                                                | Absent                                                                                                                                                                                                   | Present                                                                                                                                                                                         | Present                                                            | Absent                                                           | Absent                                               | Absent                                                                                                                 | Absent                                      | Absent                                                                                                                                  |
| Pulmonary edema                                 | Gross and histologic assessment       | Present                                                                     | Present                                                                         | Present                                                            | Unknown                                                                                                                                                | Present                                                                                                                                                                                                  | Present                                                                                                                                                                                         | Present                                                            | Present                                                          | Unknown                                              | Present                                                                                                                | Present                                     | Present                                                                                                                                 |
| Pulmonary emphysema                             | Histologic assessment - HE            | Absent                                                                      | Present, associated to pneumonia                                                | Present, associated to pneumonia and pleuritis                     | Unknown                                                                                                                                                | Present, associated to pneumonia                                                                                                                                                                         | Absent                                                                                                                                                                                          | Present, very little associated pneumonia                          | Present, associated to pneumonia                                 | Unknown                                              | Present, associated to pneumonia                                                                                       | Present, very little associated pneumonia   | Present, associated to pneumonia                                                                                                        |
| Presence of foreign material in lungs           | Histologic assessment - HE            | Unknown                                                                     | No                                                                              | No                                                                 | Unknown                                                                                                                                                | No                                                                                                                                                                                                       | No                                                                                                                                                                                              | No                                                                 | No                                                               | Unknown                                              | No                                                                                                                     | No                                          | No                                                                                                                                      |
| Petechiae - pleural                             | Histologic assessment - HE            | Present                                                                     | Present                                                                         | Present                                                            | Unknown                                                                                                                                                | Absent                                                                                                                                                                                                   | Absent                                                                                                                                                                                          | Absent                                                             | Absent                                                           | Unknown                                              | Absent                                                                                                                 | Absent                                      | Absent                                                                                                                                  |
| Petechiae - epicardial                          | Histologic assessment - HE            | Present                                                                     | Absent                                                                          | Present                                                            | Unknown                                                                                                                                                | Absent                                                                                                                                                                                                   | Absent                                                                                                                                                                                          | Absent                                                             | Absent                                                           | Unknown                                              | Absent                                                                                                                 | Absent                                      | Absent                                                                                                                                  |
| Skeletal muscle hemorrhage                      | Histologic assessment - HE            | Unknown                                                                     | Absent                                                                          | Absent                                                             | Unknown                                                                                                                                                | Absent                                                                                                                                                                                                   | Absent                                                                                                                                                                                          | Absent                                                             | Absent                                                           | Unknown                                              | Absent                                                                                                                 | Absent                                      | Absent                                                                                                                                  |
| Skeletal muscle myofiber degeneration           | Histologic assessment - PTAH          | Unknown                                                                     | Mild                                                                            | Absent                                                             | Unknown                                                                                                                                                | Absent                                                                                                                                                                                                   | Unknown                                                                                                                                                                                         | Absent                                                             | Absent                                                           | Unknown                                              | Absent                                                                                                                 | Absent                                      | Mild                                                                                                                                    |
| Reticulum fiber structures lung                 | Histologic assessment - HE and Gomori | Unknown                                                                     | Unspecific                                                                      | Unspecific                                                         | Unspecific                                                                                                                                             | Unspecific                                                                                                                                                                                               | Unspecific                                                                                                                                                                                      | Unspecific                                                         | Unspecific                                                       | Unknown                                              | Unspecific                                                                                                             | Unspecific                                  | Unspecific                                                                                                                              |
| Organ congestion - adrenal                      | Histologic assessment - HE            | No                                                                          | Present                                                                         | Present                                                            | Unknown                                                                                                                                                | Present                                                                                                                                                                                                  | Present                                                                                                                                                                                         | Haemorrhage                                                        | Present                                                          | Unknown                                              | Present                                                                                                                | Present                                     | No                                                                                                                                      |
| Organ congestion - brain                        | Histologic assessment - HE            | Unknown                                                                     | Present                                                                         | No                                                                 | Unknown                                                                                                                                                | No                                                                                                                                                                                                       | Present                                                                                                                                                                                         | No                                                                 | Present                                                          | Unknown                                              | Present                                                                                                                | Present                                     | Present                                                                                                                                 |
| Organ congestion - heart                        | Histologic assessment - HE            | No                                                                          | Present                                                                         | No                                                                 | Unknown                                                                                                                                                | No                                                                                                                                                                                                       | No                                                                                                                                                                                              | Present                                                            | Present                                                          | Unknown                                              | Present                                                                                                                | Present                                     | No                                                                                                                                      |
| Organ congestion - kidney                       | Histologic assessment - HE            | No                                                                          | Present                                                                         | Present                                                            | Unknown                                                                                                                                                | Present                                                                                                                                                                                                  | No                                                                                                                                                                                              | Present                                                            | Present                                                          | Unknown                                              | Present                                                                                                                | Present                                     | Present                                                                                                                                 |
| Organ congestion - liver                        | Histologic assessment - HE            | No                                                                          | Present                                                                         | No                                                                 | Unknown                                                                                                                                                | Present                                                                                                                                                                                                  | No                                                                                                                                                                                              | Present                                                            | Present                                                          | Unknown                                              | No                                                                                                                     | No                                          | No                                                                                                                                      |
| Organ congestion - lung                         | Histologic assessment - HE            | Present                                                                     | Present                                                                         | Present                                                            | Unknown                                                                                                                                                | Present                                                                                                                                                                                                  | No                                                                                                                                                                                              | Present                                                            | Present                                                          | Unknown                                              | Present                                                                                                                | Present                                     | Present                                                                                                                                 |
| Organ congestion - spleen                       | Histologic assessment - HE            | No                                                                          | Present                                                                         | No                                                                 | Unknown                                                                                                                                                | Present                                                                                                                                                                                                  | No                                                                                                                                                                                              | Present                                                            | Unknown                                                          | Unknown                                              | Present                                                                                                                | Present                                     | Present                                                                                                                                 |
| Multiple organ congestion - 2 or more           | Previous single organ assessment      | Lung only                                                                   | Yes, all 7                                                                      | Yes 3                                                              | Unknown                                                                                                                                                | Yes 5                                                                                                                                                                                                    | Yes 2                                                                                                                                                                                           | Yes 5 or 6                                                         | Yes 6                                                            | Unknown                                              | Yes 6                                                                                                                  | Yes 6                                       | Yes 4                                                                                                                                   |
| Inner ear                                       | Scanning Electron Microscopy          |                                                                             |                                                                                 |                                                                    |                                                                                                                                                        |                                                                                                                                                                                                          | Unilateral impaired hearing, focal hemorrhages in the cochlea                                                                                                                                   |                                                                    |                                                                  |                                                      | Focal hemorrhages in the cochlea                                                                                       |                                             |                                                                                                                                         |
| Net marks, imprints or incisions                | Histologic assessment - HE            | Not conducted                                                               | Not conducted                                                                   | Not conducted                                                      | Not conducted                                                                                                                                          | Not conducted                                                                                                                                                                                            | Focal loss of epidermis, some hemorrhage, no infiltrates                                                                                                                                        | Not conducted                                                      | Not conducted                                                    | Not conducted                                        | Focal loss of epidermis, some hemorrhage, some infiltrates                                                             | Not conducted                               | Focal loss of epidermis, no hemorrhage, no inflammatory reaction                                                                        |
| Main pathological findings                      | Gross and histologic assessment       | Focal loss of epidermis, some hemorrhage, some infiltrates                  | Focal loss of epidermis, no inflammatory reaction                               | Focal loss of epidermis, some hemorrhage, no inflammatory reaction | Not conducted                                                                                                                                          | Focal loss of epidermis, some hemorrhage, no inflammatory reaction                                                                                                                                       | Focal loss of epidermis, some hemorrhage, some infiltrates                                                                                                                                      | Focal loss of epidermis, some hemorrhage, no inflammatory reaction | Focal loss of epidermis, no hemorrhage, no inflammatory reaction | Not conducted                                        | Focal loss of epidermis, some hemorrhage, some infiltrates                                                             | Not conducted                               | Focal loss of epidermis, no hemorrhage, no inflammatory reaction                                                                        |
|                                                 |                                       | No other significant findings, although freezing artefacts are apparent.    | Myocarditis, multifocal mild enteritis, mild pneumonia, mild cholangiohepatitis | No other significant findings                                      | Moderate verminous pneumonia. No histology.                                                                                                            | Chronic, multifocal, ulcerated and suppurative dermatitis, severe multifocal granulomatous bronchopneumonia with intralésional nematodes, ulcerated esophagus, chronic hepatitis and meningoencephalitis | Multifocal moderate bacterial dermatitis, subacute nephritis, multifocal severe verminous bronchopneumonia, mild diffuse enteritis, hepatitis, unilateral impaired hearing (Morell et al. 2017) | No other significant findings                                      | Mild verminous pneumonia, mild hemochromatose                    | Severe parasitosis, moderate pneumonia. No histology | Focal severe proliferative dermatitis and multifocal mild viral dermatitis, moderate verminous and bacterial pneumonia | Mild encephalitis, mild verminous pneumonia | Osteomyelitis mandible (old trauma) and (bacterial) dermatitis (old trauma, most likely grey seal bites). Moderate verminous pneumonia. |
| Comments                                        | All of above                          | No paraffin embedded tissues available for reassessment/additional staining | NA                                                                              | NA                                                                 | Animal temporarily left in a harbor for the purpose of another study (findings not presented here), therefore DCC4 at necropsy and no histology taken. | NA                                                                                                                                                                                                       | NA                                                                                                                                                                                              | NA                                                                 | NA                                                               | Decomposed and most likely bycaught post-mortem      | NA                                                                                                                     | NA                                          | NA                                                                                                                                      |

*Veterinary Pathology: Supplemental Materials.*

IJsseldijk et al. Challenges in the assessment of bycatch:

Post-mortem findings in harbor porpoises (*Phocoena phocoena*) retrieved from gillnets.

**Supplemental Table S4:** Overview of net induced lesions and imprints observed during macroscopic assessment of bycaught harbor porpoises

|        | Pectoral fin(s)     |              |           | Dorsal fin                   |              |           | Fluke                        |              |           | Mouth edges |              |           | Encircling imprint |                                      |
|--------|---------------------|--------------|-----------|------------------------------|--------------|-----------|------------------------------|--------------|-----------|-------------|--------------|-----------|--------------------|--------------------------------------|
| Case # | Presence            | Distribution | Severity  | Presence                     | Distribution | Severity  | Presence                     | Distribution | Severity  | Presence    | Distribution | Severity  | Presence           | Location                             |
| 1      | Left and right side | Multifocal   | Extensive | On trailing and leading edge | Multifocal   | Mild      | On trailing and leading edge | Multifocal   | Extensive | Absent      | NA           | NA        | Present            | Cranial to pectoral fins around body |
| 2      |                     |              |           | On trailing and leading edge | Focal        | Moderate  | On trailing and leading edge | Multifocal   | Extensive | Absent      | NA           | NA        | Absent             | NA                                   |
| 3      | Right side          | Multifocal   | Severe    |                              |              |           | On trailing and leading edge | Multifocal   | Extensive | Present     | Multifocal   | Mild      | Present            | Around head                          |
| 4      | Left and right side | Focal        | Severe    | On leading edge              | Focal        | Mild      | On trailing and leading edge | Multifocal   | Extensive | Present     | Focal        | Moderate  | Absent             | NA                                   |
| 5      | Left and right side | Multifocal   | Extensive | On trailing and leading edge | Focal        | Mild      | On trailing and leading edge | Multifocal   | Extensive | Present     | Focal        | Moderate  | Absent             | NA                                   |
| 6      | Right side          | Multifocal   | Mild      | Absent                       | NA           | NA        | Absent                       | NA           | NA        | Absent      | NA           | NA        | Absent             | NA                                   |
| 7      | Right side          | Multifocal   | Mild      | On trailing edge             | Focal        | Mild      | On trailing and leading edge | Multifocal   | Moderate  | Present     | Multifocal   | Severe    | Present            | On rostrum                           |
| 8      | Left and right side | Multifocal   | Mild      | On trailing edge             | Focal        | Mild      | Absent                       | NA           | NA        | Present     | Focal        | Moderate  | Present            | On rostrum                           |
| 9      | Left and right side | Multifocal   | Mild      | On trailing and leading edge | Focal        | Mild      | On trailing and leading edge | Multifocal   | Moderate  | Absent      | NA           | NA        | Present            | On rostrum                           |
| 10     | Left and right side | Multifocal   | Extensive | On leading edge              | Focal        | Mild      | On trailing and leading edge | Multifocal   | Extensive | Absent      | NA           | NA        | Absent             | NA                                   |
| 11     | Left and right side | Multifocal   | Extensive | On trailing edge             | Focal        | Mild      | On trailing and leading edge | Multifocal   | Mild      | Present     | Focal        | Mild      | Present            | On rostrum                           |
| 12     | Left side           | Focal        | Severe    | On trailing and leading edge | Multifocal   | Mild      | On trailing and leading edge | Multifocal   | Extensive | Present     | Focal        | Mild      | Present            | On rostrum                           |
|        | Left and right side | Multifocal   | Extensive | On trailing and leading edge | Multifocal   | Extensive | On trailing and leading edge | Multifocal   | Extensive | Present     | Multifocal   | Extensive | Present            | On rostrum                           |

Post-mortem findings in harbor porpoises (*Phocoena phocoena*) retrieved from gillnets.

|        |        | Pelagic prey    |         |       |       | Demersal prey |         |         |                  |        |               |                |           |  |
|--------|--------|-----------------|---------|-------|-------|---------------|---------|---------|------------------|--------|---------------|----------------|-----------|--|
| Case # |        | Lesser pipefish | Herring | Sprat | Smelt | Sandeel       | Goby    | Whiting | Five-bearded Bib | Total  | Total pelagic | Total demersal |           |  |
| 1      | Number | 0               | 0       | 0     | 0     | 24            | 500     | 0       | 0                | 0      | 524           | 0              | 524       |  |
|        | Mass   | 0               | 0       | 0     | 0     | 212.58        | 239.4   | 0       | 0                | 0      | 451.98        | 0              | 451.98    |  |
| 2      | Number | 0               | 5       | 3     | 0     | 86            | 1585    | 0       | 0                | 0      | 1679          | 8              | 1671      |  |
|        | Mass   | 0               | 52.28   | 22.56 | 0     | 628.31        | 1383.77 | 0       | 0                | 0      | 2086.92       | 74.84          | 2012.08   |  |
| 3      | Number | 0               | 3       | 0     | 2     | 47            | 494     | 0       | 0                | 0      | 546           | 5              | 541       |  |
|        | Mass   | 0               | 34.46   | 0     | 4.29  | 293.37        | 407.76  | 0       | 0                | 0      | 739.88        | 38.75          | 701.13    |  |
| 4      | Number | 1               | 0       | 0     | 0     | 15            | 0       | 0       | 0                | 0      | 16            | 1              | 15        |  |
|        | Mass   | 0.24            | 0       | 0     | 0     | 261.14        | 0       | 0       | 0                | 0      | 261.38        | 0.24           | 261.14    |  |
| 5      | Number | 0               | 0       | 0     | 0     | 0             | 107     | 0       | 0                | 0      | 107           | 0              | 107       |  |
|        | Mass   | 0               | 0       | 0     | 0     | 0             | 132.22  | 0       | 0                | 0      | 132.22        | 0              | 132.22    |  |
| 6      | Number | 30              | 0       | 0     | 0     | 0             | 0       | 0       | 0                | 0      | 30            | 30             | 0         |  |
|        | Mass   | 14.96           | 0       | 0     | 0     | 0             | 0       | 0       | 0                | 0      | 14.96         | 14.96          | 0         |  |
| 7      | Number | 0               | 0       | 0     | 0     | 0             | 848     | 0       | 0                | 0      | 848           | 0              | 848       |  |
|        | Mass   | 0               | 0       | 0     | 0     | 0             | 958.54  | 0       | 0                | 0      | 958.54        | 0              | 958.54    |  |
| 8      | Number | 0               | 0       | 0     | 0     | 10            | 2       | 3       | 0                | 0      | 15            | 0              | 15        |  |
|        | Mass   | 0               | 0       | 0     | 0     | 89.79         | 0.30    | 222.56  | 0                | 0      | 312.65        | 0              | 312.65    |  |
| 10     | Number | 45              | 0       | 0     | 0     | 0             | 343     | 7       | 0                | 4      | 399           | 45             | 354       |  |
|        | Mass   | 25.04           | 0       | 0     | 0     | 0             | 404.39  | 427.03  | 0                | 112.03 | 968.49        | 25.04          | 943.45    |  |
| 11     | Number | 0               | 0       | 1     | 0     | 17            | 0       | 0       | 0                | 0      | 18            | 1              | 17        |  |
|        | Mass   | 0               | 0       | 23.11 | 0     | 79.28         | 0       | 0       | 0                | 0      | 102.39        | 23.11          | 79.28     |  |
| 12     | Number | 0               | 0       | 1     | 1     | 15            | 957     | 9       | 1                | 109    | 1093          | 2              | 1091      |  |
|        | Mass   | 0               | 0       | 10.94 | 15.41 | 52.9          | 2636.6  | 13.51   | 36.26            | 26.75  | 2792.37       | 26.35          | 2766.02   |  |
|        |        |                 |         |       |       |               |         |         |                  |        | Pelagic       |                | Demersal  |  |
|        |        |                 |         |       |       |               |         |         |                  |        | 92            |                | 5183      |  |
|        |        |                 |         |       |       |               |         |         |                  |        | 203.29        |                | 8618.49   |  |
|        |        |                 |         |       |       |               |         |         |                  |        | 1.74          |                | 98.26 %-n |  |
|        |        |                 |         |       |       |               |         |         |                  |        | 2.30          |                | 97.70 %-M |  |
